# Supplementary material
Source: PubMed Central journal article supplement (PMC7585364)
Supplement: mmc1.pdf [file mmc1.pdf]

**Edge weight (regularized partial correlations) among nodes in the network**

| <b>Edge</b> | <b>Weight</b> | <b>p</b> |
|-------------|---------------|----------|
| STO-PPE     | 0.10          | <.001    |
| STO-SEC     | 0.10          | <.001    |
| STO-CHE     | 0.09          | <.001    |
| PPE-CHE     | 0.18          | <.001    |
| PPE-ALT     | 0.17          | <.001    |
| PPE-DAN     | 0.06          | <.001    |
| ALT-CHE     | 0.17          | <.001    |
| CHE-XEN     | 0.08          | <.001    |
| CHE-SEC     | 0.07          | <.001    |
| CHE-TSS     | 0.39          | <.001    |
| CHE-DIS     | 0.07          | <.001    |
| CHE-DAN     | 0.05          | <.003    |
| SEC-XEN     | 0.22          | <.001    |
| SEC-DAN     | 0.35          | <.001    |
| SEC-VAX     | 0.07          | <.001    |
| SEC-TSS     | 0.13          | <.001    |
| XEN-CON     | 0.15          | <.001    |
| XEN-DAN     | 0.19          | <.001    |
| XEN-HCW     | 0.16          | <.001    |
| XEN-DIS     | 0.06          | <.001    |
| CON-EXG     | 0.09          | <.001    |
| CON-VAX     | 0.34          | <.001    |
| VAX-EXG     | 0.18          | <.001    |
| EXG-DAN     | -0.11         | <.001    |
| EXG-ROB     | 0.28          | <.001    |
| EXG-DIS     | 0.37          | <.001    |
| EXG-HYG     | -0.08         | <.001    |
| DIS-HYG     | -0.08         | <.001    |
| DIS-ROB     | 0.13          | <.001    |
| ROB-DAN     | -0.18         | <.001    |
| DAN-AVS     | 0.20          | <.001    |
| DAN-HCW     | 0.18          | <.001    |
| TSS-AVS     | 0.06          | <.001    |
| TSS-DAN     | 0.18          | <.001    |
